# Supplementary material for: Integrated Genomic and Transcriptomic Analysis Improves Disease Classification and Risk Stratification of MDS with Ring Sideroblasts
Source: PubMed Central journal article supplement — Clin Cancer Res. 2023 Jul 27;29(20):4256–67. doi: 10.1158/1078-0432.CCR-23-0538 (PMC10570683; doi:10.1158/1078-0432.ccr-23-0538), 2023-07-27
Supplement: ccr-23-0538_supplementary_figure_s1_suppfs1.pdf [file ccr-23-0538_supplementary_figure_s1_suppfs1.pdf]

GENETIC GROUP  
 WHO  
 BM RS %

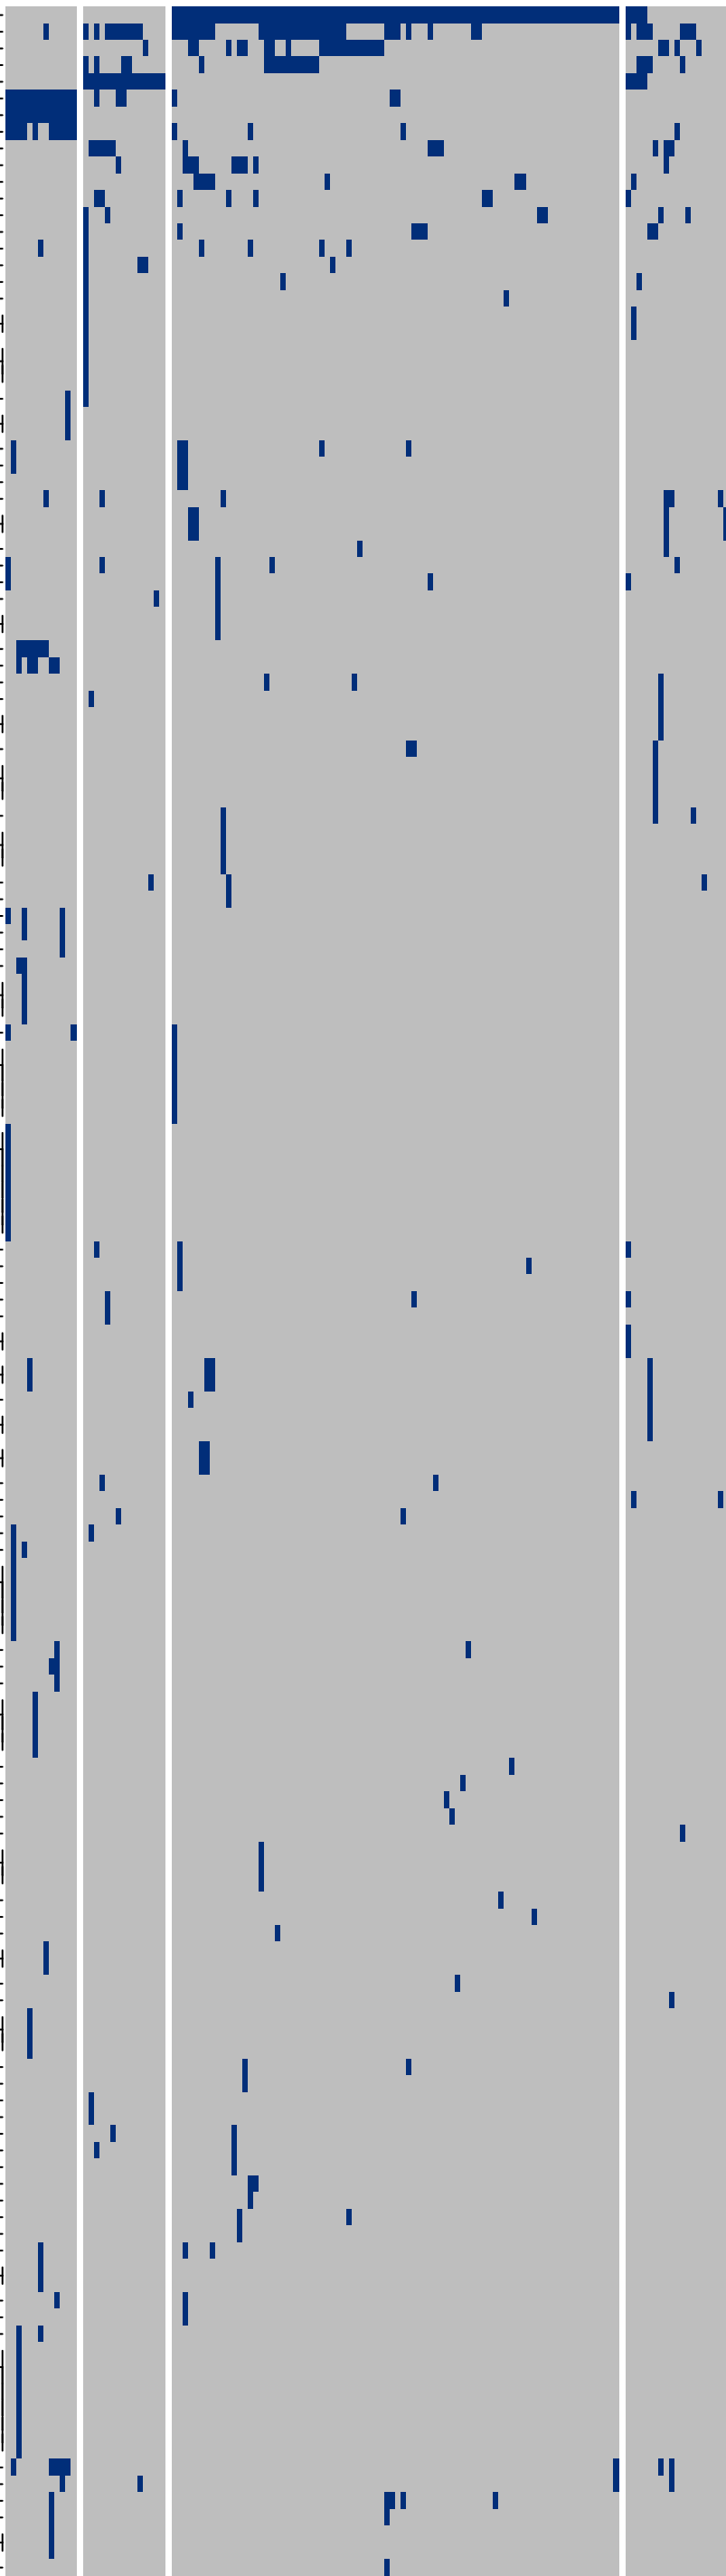

SF3B1  
 TET2  
 DNMT3A  
 TET2 multi hit  
 SRSF2  
 TP53  
 TP53 multi hit  
 del5q  
 ASXL1  
 RUNX1  
 delY  
 CUX1  
 IDH2  
 CBL  
 KMT2C  
 IDH1  
 upd4q  
 DNMT3B  
 STAG2 multi hit  
 STAG2  
 GATA1  
 ROBO1  
 GATA1 multi hit  
 plus1q  
 del10  
 del4  
 EZH2  
 EZH2 multi hit  
 upd7g  
 U2AF1  
 BCOR multi hit  
 BCOR  
 EP300  
 del20q  
 SH2B3  
 GNB1  
 upd1p  
 GNB1 multi hit  
 del6p  
 upd17p  
 DNMT3A multi hit  
 CSF3R  
 upd2p  
 PHIP  
 plus8  
 EED  
 SETBP1 multi hit  
 PRPF8  
 SETBP1  
 SETD2  
 YLPM1 multi hit  
 YLPM1  
 del11q  
 NOTCH1  
 del15  
 del17p  
 KRAS multi hit  
 plus3q  
 plus1p  
 plus10q  
 del1q  
 del7q  
 plus15  
 plus13  
 plus9  
 plus16p  
 plus17q  
 SH2B3 multi hit  
 del13  
 upd17  
 plus19p  
 plus12q  
 del6  
 del14  
 CUX1 multi hit  
 upd14q  
 CALR  
 MPL  
 CEBPA  
 BRCC3 multi hit  
 BRCC3  
 ZRSR2 multi hit  
 ZRSR2  
 upd11q  
 CBL multi hit  
 ASXL2  
 PHF6 multi hit  
 PHF6  
 ASXL1 multi hit  
 KMT2A  
 PTPN11  
 ETV6  
 del3  
 ETV6 multi hit  
 del12p  
 del4q  
 plus4p  
 plus8q  
 upd3q  
 plus5p  
 upd18q  
 ATRX  
 ATRX multi hit  
 DDX41 multi hit  
 DDX41  
 ERCC2  
 ETNK1  
 GNAS  
 KMT2D  
 ROBO2  
 PTPRF  
 SF1  
 RAD50  
 SF3B1 multi hit  
 SMC1A  
 del1p  
 del12g  
 STAT5A  
 del2p  
 upd6q  
 plus11q  
 plus11p  
 del5  
 ZBTB33  
 ZBTB33 multi hit  
 SRSF2 multi hit  
 upd17q  
 GATA2  
 NRAS  
 NRAS multi hit  
 CSNK1A1  
 CSNK1A1 multi hit  
 BCORL1  
 BCORL1 multi hit  
 upd21q  
 del21  
 del18  
 upd11p  
 RUNX1 multi hit  
 del9q  
 DDX4  
 DDX4 multi hit  
 NOTCH2  
 NOTCH2 multi hit  
 del3p  
 plus9p  
 plus1  
 del7  
 KRAS  
 JAK2  
 PPM1D  
 plus19q  
 CDKN2A  
 SUZ12

**MUT GENETIC GROUP**

0  
 1

**GENETIC GROUP**

SF3B1  
 SRSF2  
 TP53<sup>MH</sup>  
 NOS

**WHO**

MDS RS SLD  
 MDS RS MLD  
 MDS EB1  
 MDS EB2  
 MDS MPN RS T  
 MDS MLD  
 OTHER

**BM RS %**

100  
 80  
 60  
 40  
 20  
 0
