# Supplementary material for: Integrated Genomic and Transcriptomic Analysis Improves Disease Classification and Risk Stratification of MDS with Ring Sideroblasts
Source: PubMed Central journal article supplement — Clin Cancer Res. 2023 Jul 27;29(20):4256–67. doi: 10.1158/1078-0432.CCR-23-0538 (PMC10570683; doi:10.1158/1078-0432.ccr-23-0538), 2023-07-27
Supplement: ccr-23-0538_supplementary_figure_s22_suppfs22.pdf [file ccr-23-0538_supplementary_figure_s22_suppfs22.pdf]

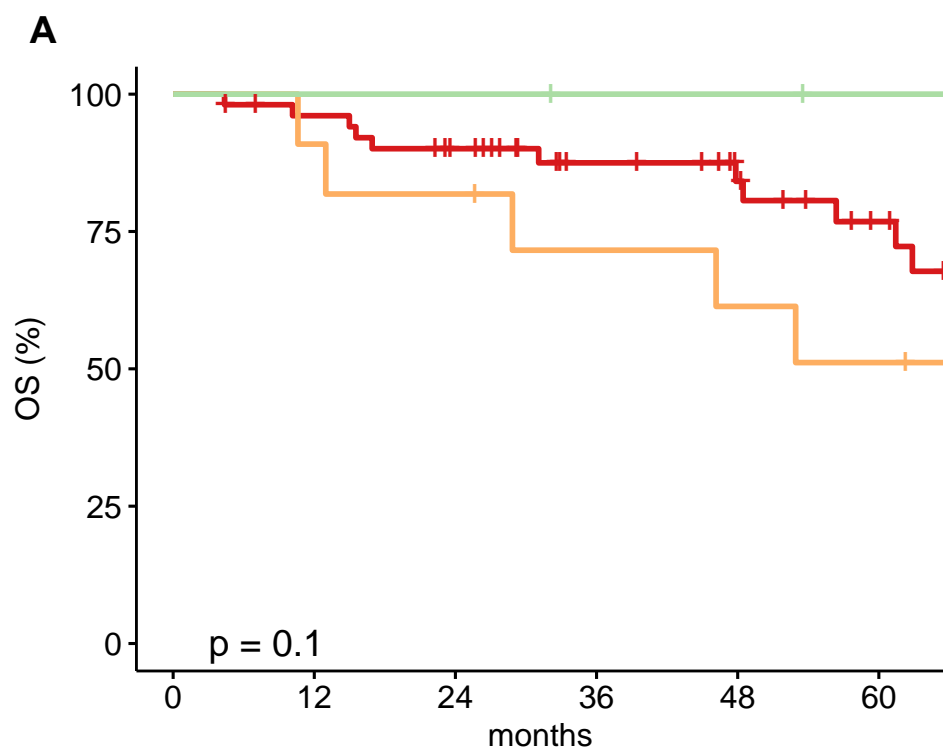

Number at risk

|     |    |    |    |    |    |    |
|-----|----|----|----|----|----|----|
| EMK | 52 | 48 | 42 | 31 | 25 | 18 |
| INT | 11 | 10 | 9  | 7  | 6  | 5  |
| IMP | 4  | 4  | 4  | 3  | 3  | 2  |

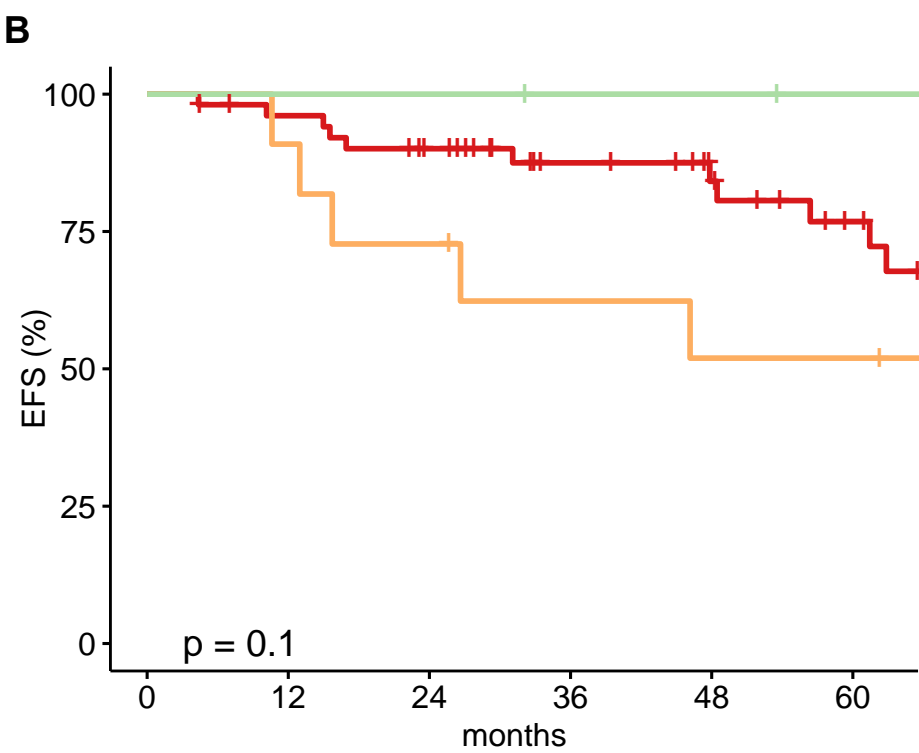

Number at risk

|     |    |    |    |    |    |    |
|-----|----|----|----|----|----|----|
| EMK | 52 | 48 | 42 | 31 | 25 | 18 |
| INT | 11 | 10 | 8  | 6  | 5  | 5  |
| IMP | 4  | 4  | 4  | 3  | 3  | 2  |

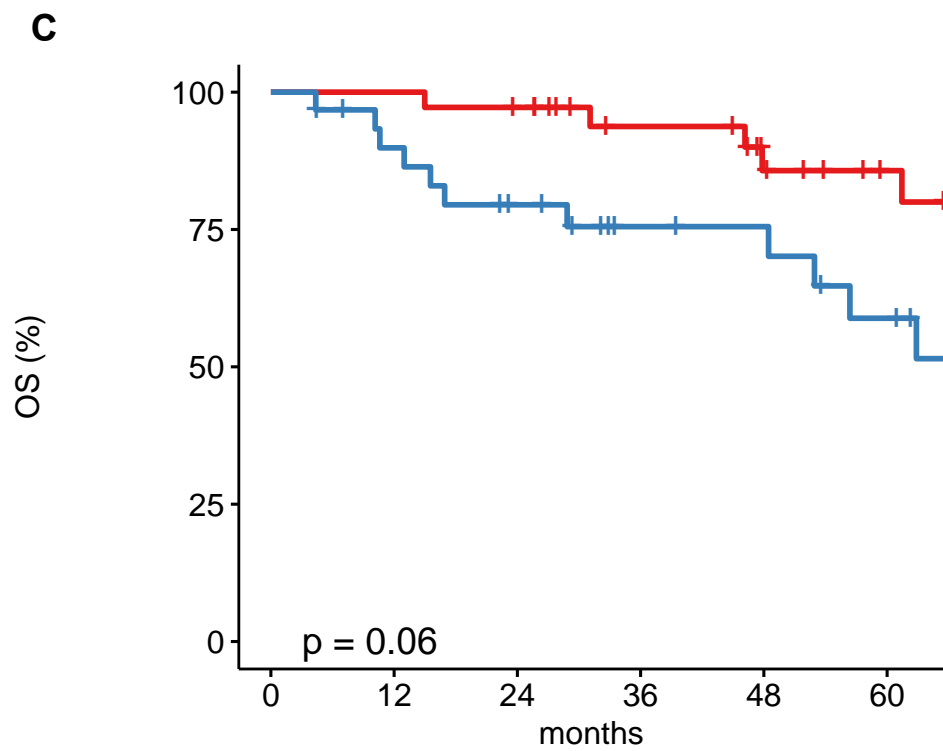

Number at risk

|                |    |    |    |    |    |    |
|----------------|----|----|----|----|----|----|
| MEP $\geq$ 38% | 36 | 36 | 34 | 26 | 20 | 15 |
| MEP < 38%      | 31 | 26 | 21 | 15 | 14 | 10 |

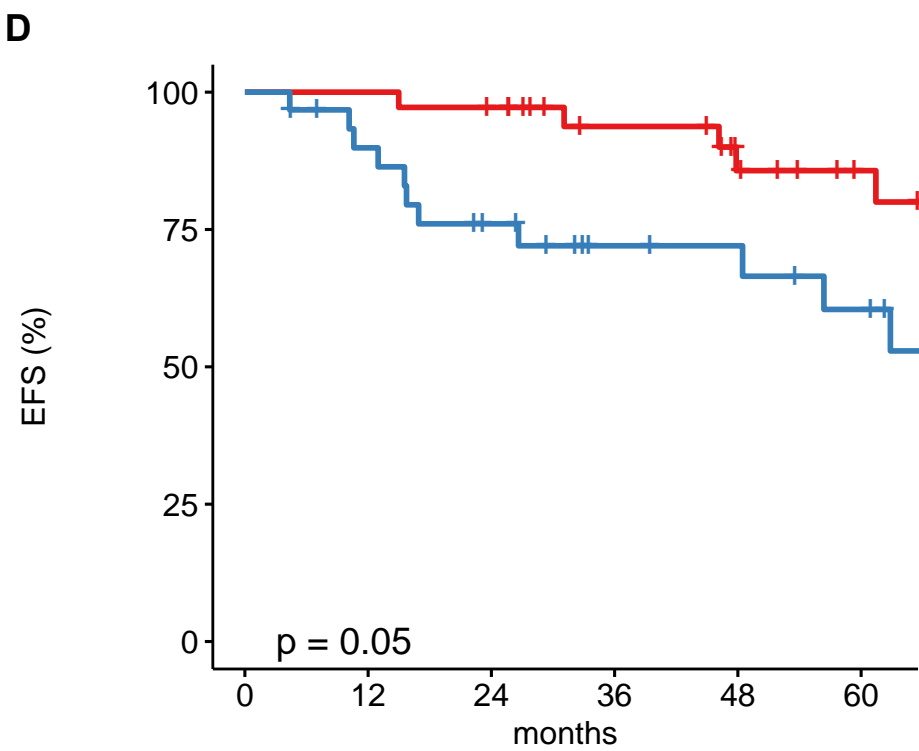

Number at risk

|                |    |    |    |    |    |    |
|----------------|----|----|----|----|----|----|
| MEP $\geq$ 38% | 36 | 36 | 34 | 26 | 20 | 15 |
| MEP < 38%      | 31 | 26 | 20 | 14 | 13 | 10 |
