# Supplementary figures and images for: Integrated Genomic and Transcriptomic Analysis Improves Disease Classification and Risk Stratification of MDS with Ring Sideroblasts
Source: PubMed Central journal article supplement — Clin Cancer Res. 2023 Jul 27;29(20):4256–67. doi: 10.1158/1078-0432.CCR-23-0538 (PMC10570683; doi:10.1158/1078-0432.ccr-23-0538), 2023-07-27

Optimal number of clusters

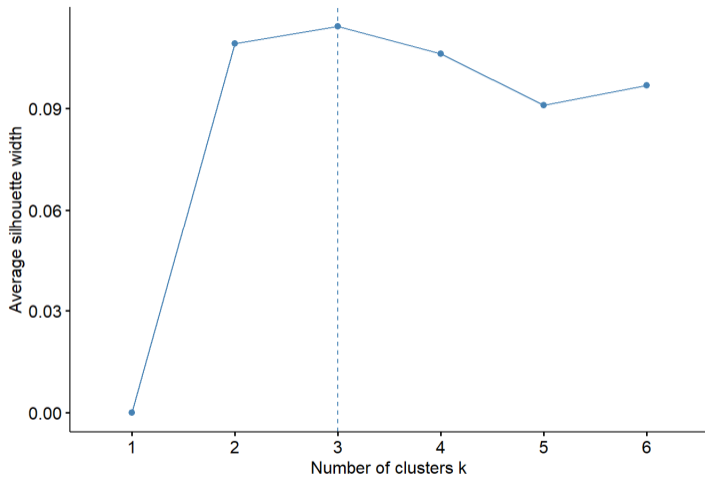

Supplement: ccr-23-0538_supplementary_figure_s10_suppfs10.pdf [file ccr-23-0538_supplementary_figure_s10_suppfs10.pdf]

# ABCB7

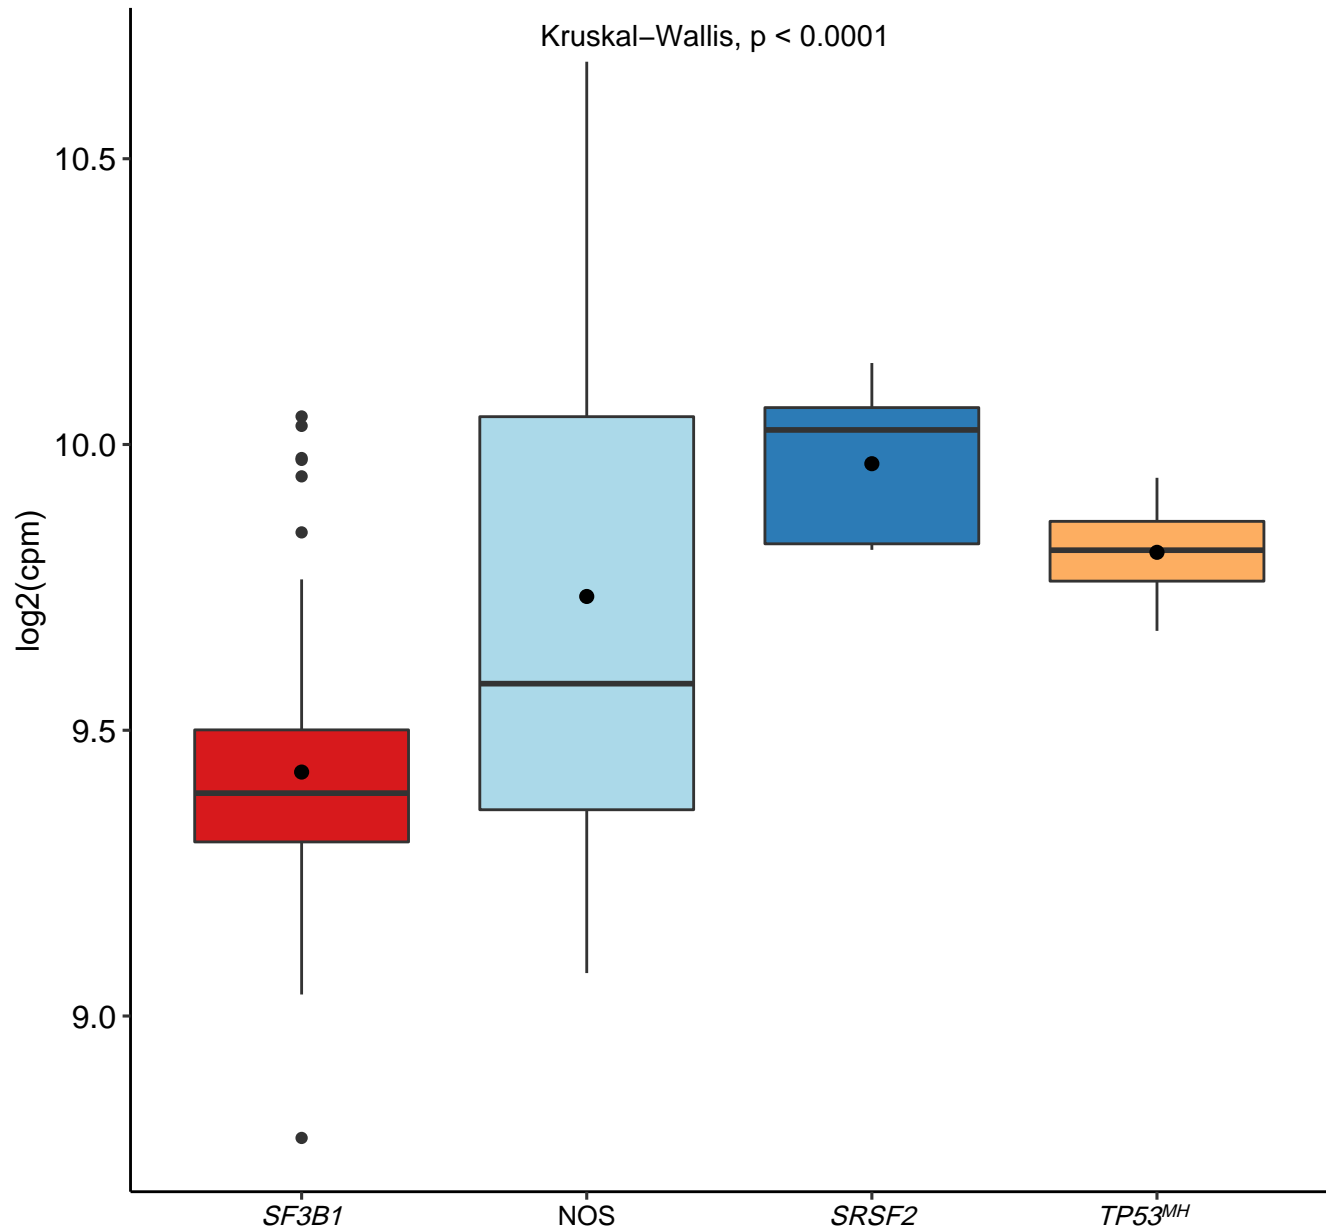

Supplement: ccr-23-0538_supplementary_figure_s11_suppfs11.pdf [file ccr-23-0538_supplementary_figure_s11_suppfs11.pdf]

EVENTS **a** A3 **a** A5 **a** MXE **a** RI **a** SE

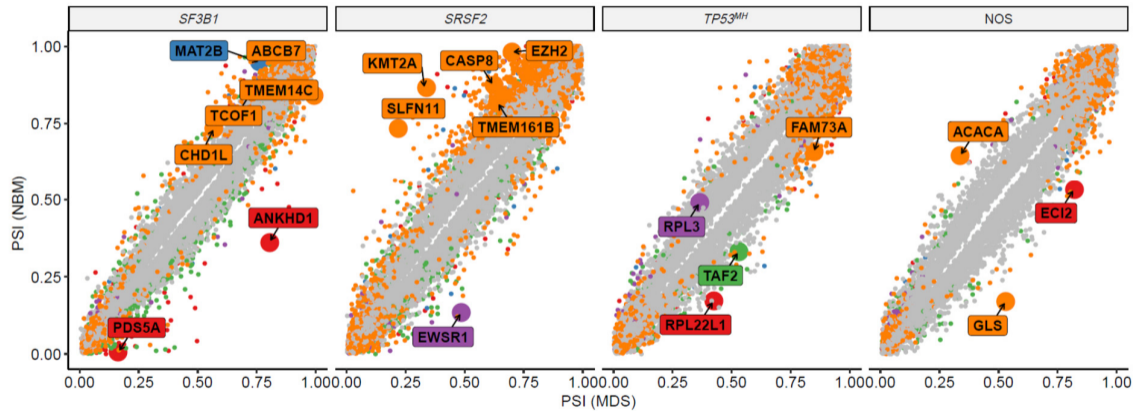

Supplement: ccr-23-0538_supplementary_figure_s12_suppfs12.pdf [file ccr-23-0538_supplementary_figure_s12_suppfs12.pdf]

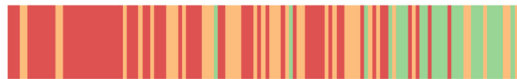

RNA\_GROUP

- EMK
- INT
- IMP

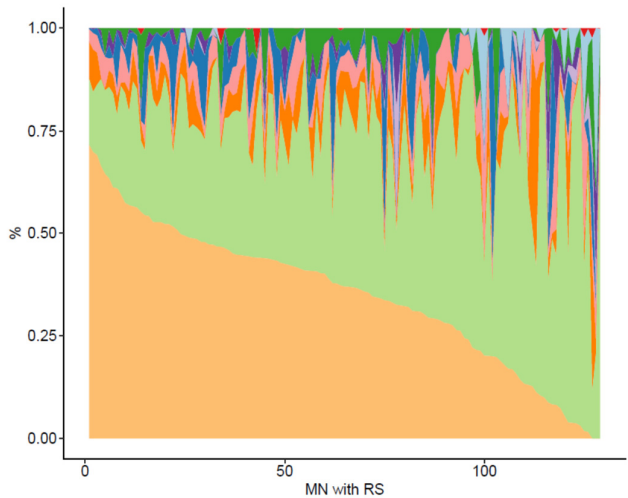

CELL

- Lymph
- CMP
- Gran
- MPP
- MLP
- EryP
- HSC
- MK
- GMP
- MEP

Supplement: ccr-23-0538_supplementary_figure_s13_suppfs13.pdf [file ccr-23-0538_supplementary_figure_s13_suppfs13.pdf]

$R = 0.6, p = 1.3e-13$

Estimated erythroid cell(%) in CD34+

0.25  
0.20  
0.15  
0.10  
0.05  
0.00

0.00 0.25 0.50 0.75 1.00

Bone Marrow Ring Sideroblasts (%)

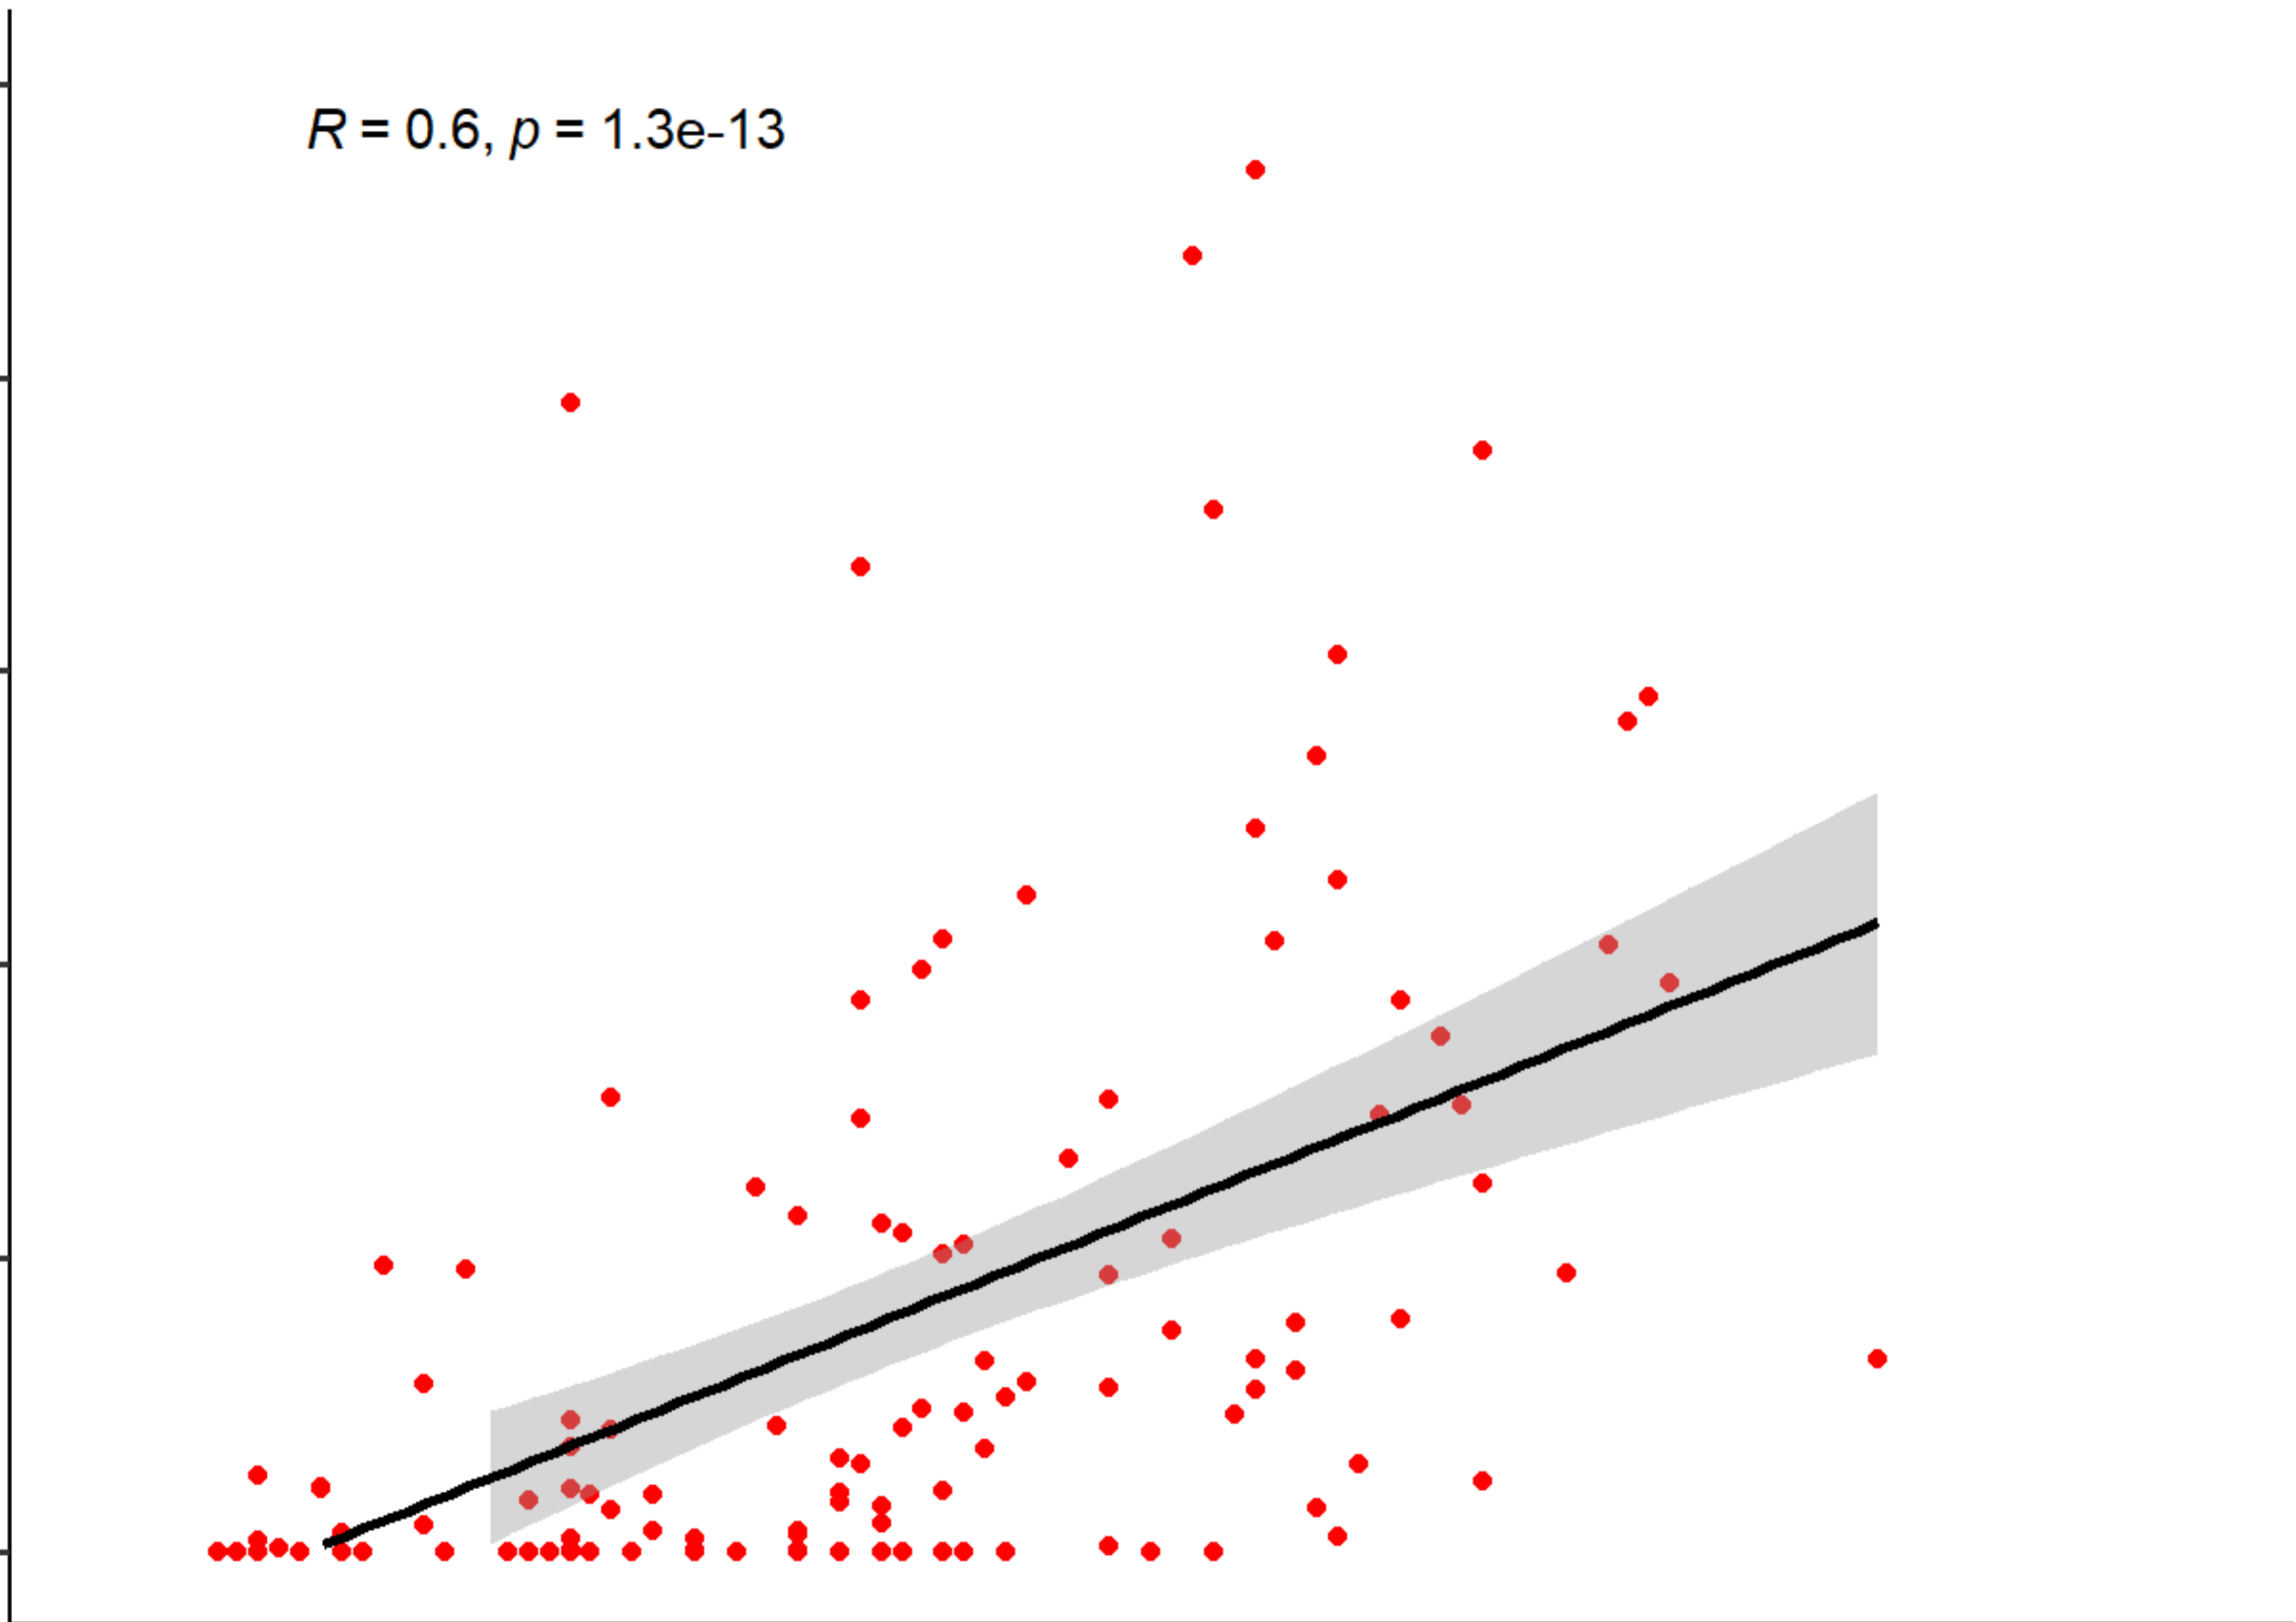

Supplement: ccr-23-0538_supplementary_figure_s14_suppfs14.pdf [file ccr-23-0538_supplementary_figure_s14_suppfs14.pdf]

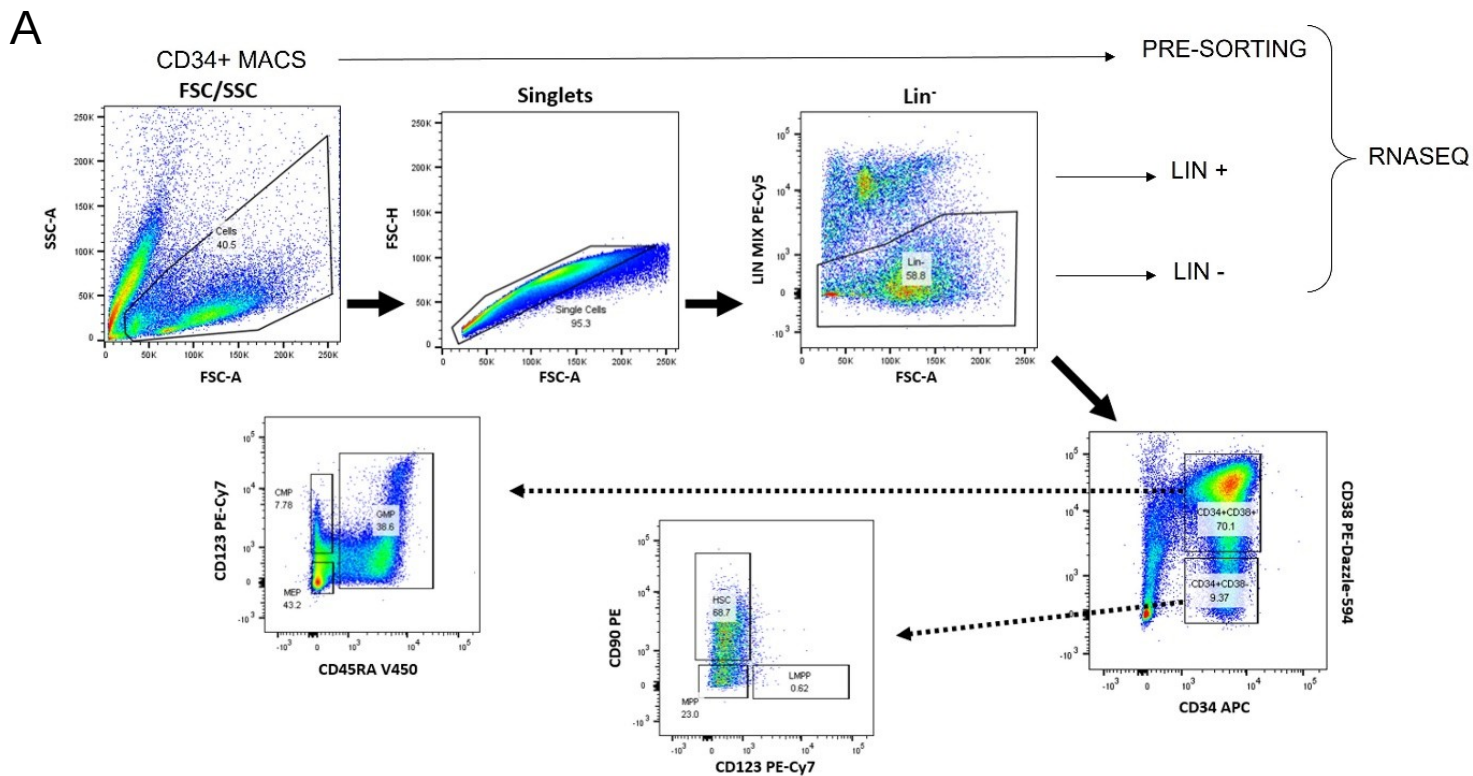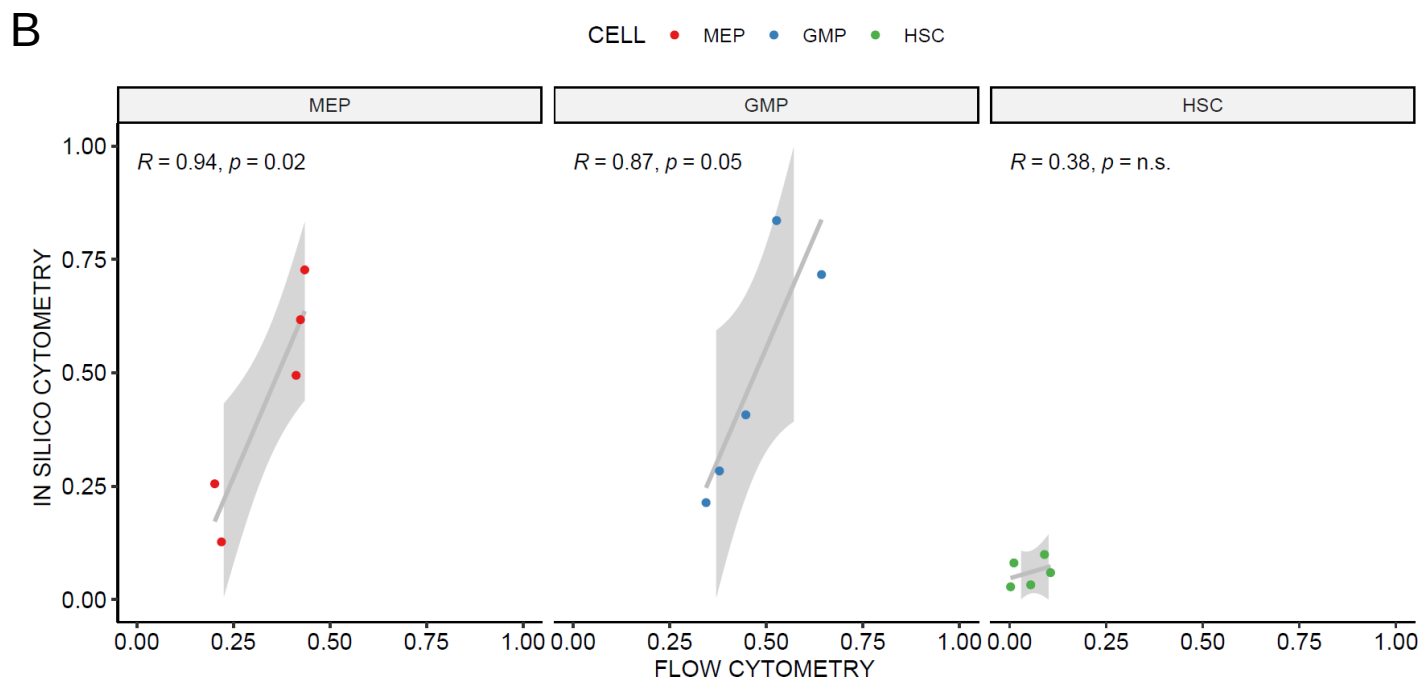

Supplement: ccr-23-0538_supplementary_figure_s15_suppfs15.pdf [file ccr-23-0538_supplementary_figure_s15_suppfs15.pdf]

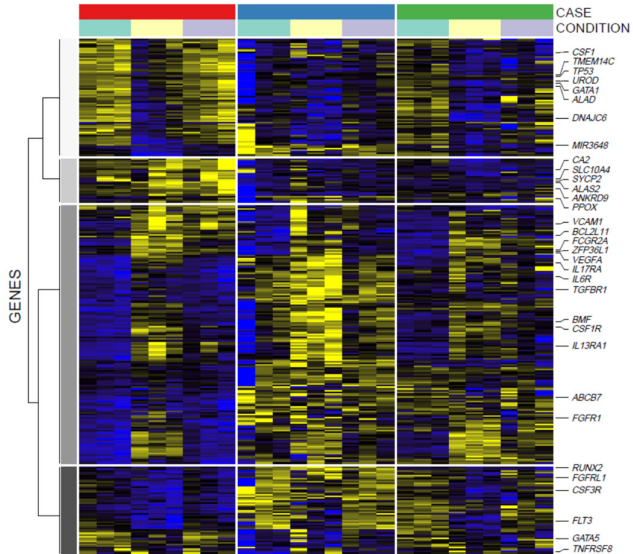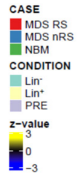

Supplement: ccr-23-0538_supplementary_figure_s16_suppfs16.pdf [file ccr-23-0538_supplementary_figure_s16_suppfs16.pdf]

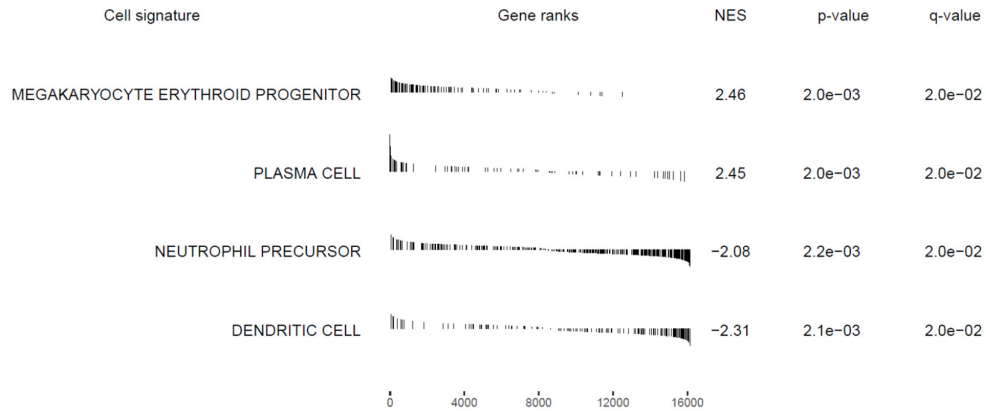

Supplement: ccr-23-0538_supplementary_figure_s17_suppfs17.pdf [file ccr-23-0538_supplementary_figure_s17_suppfs17.pdf]

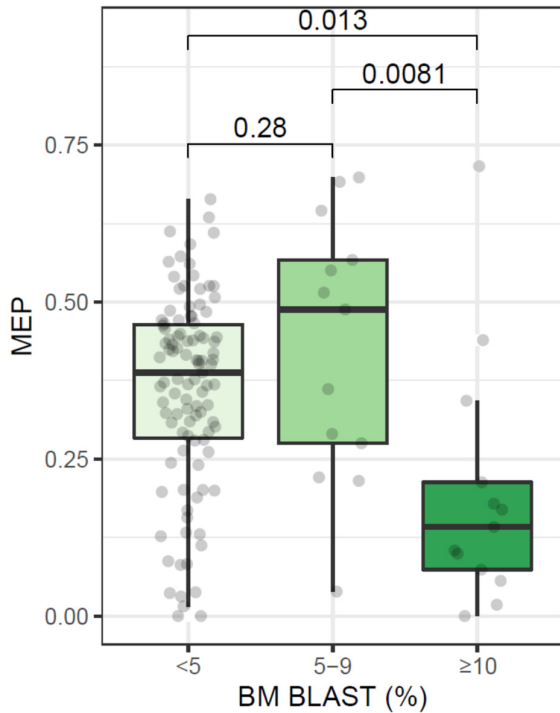

Supplement: ccr-23-0538_supplementary_figure_s18_suppfs18.pdf [file ccr-23-0538_supplementary_figure_s18_suppfs18.pdf]

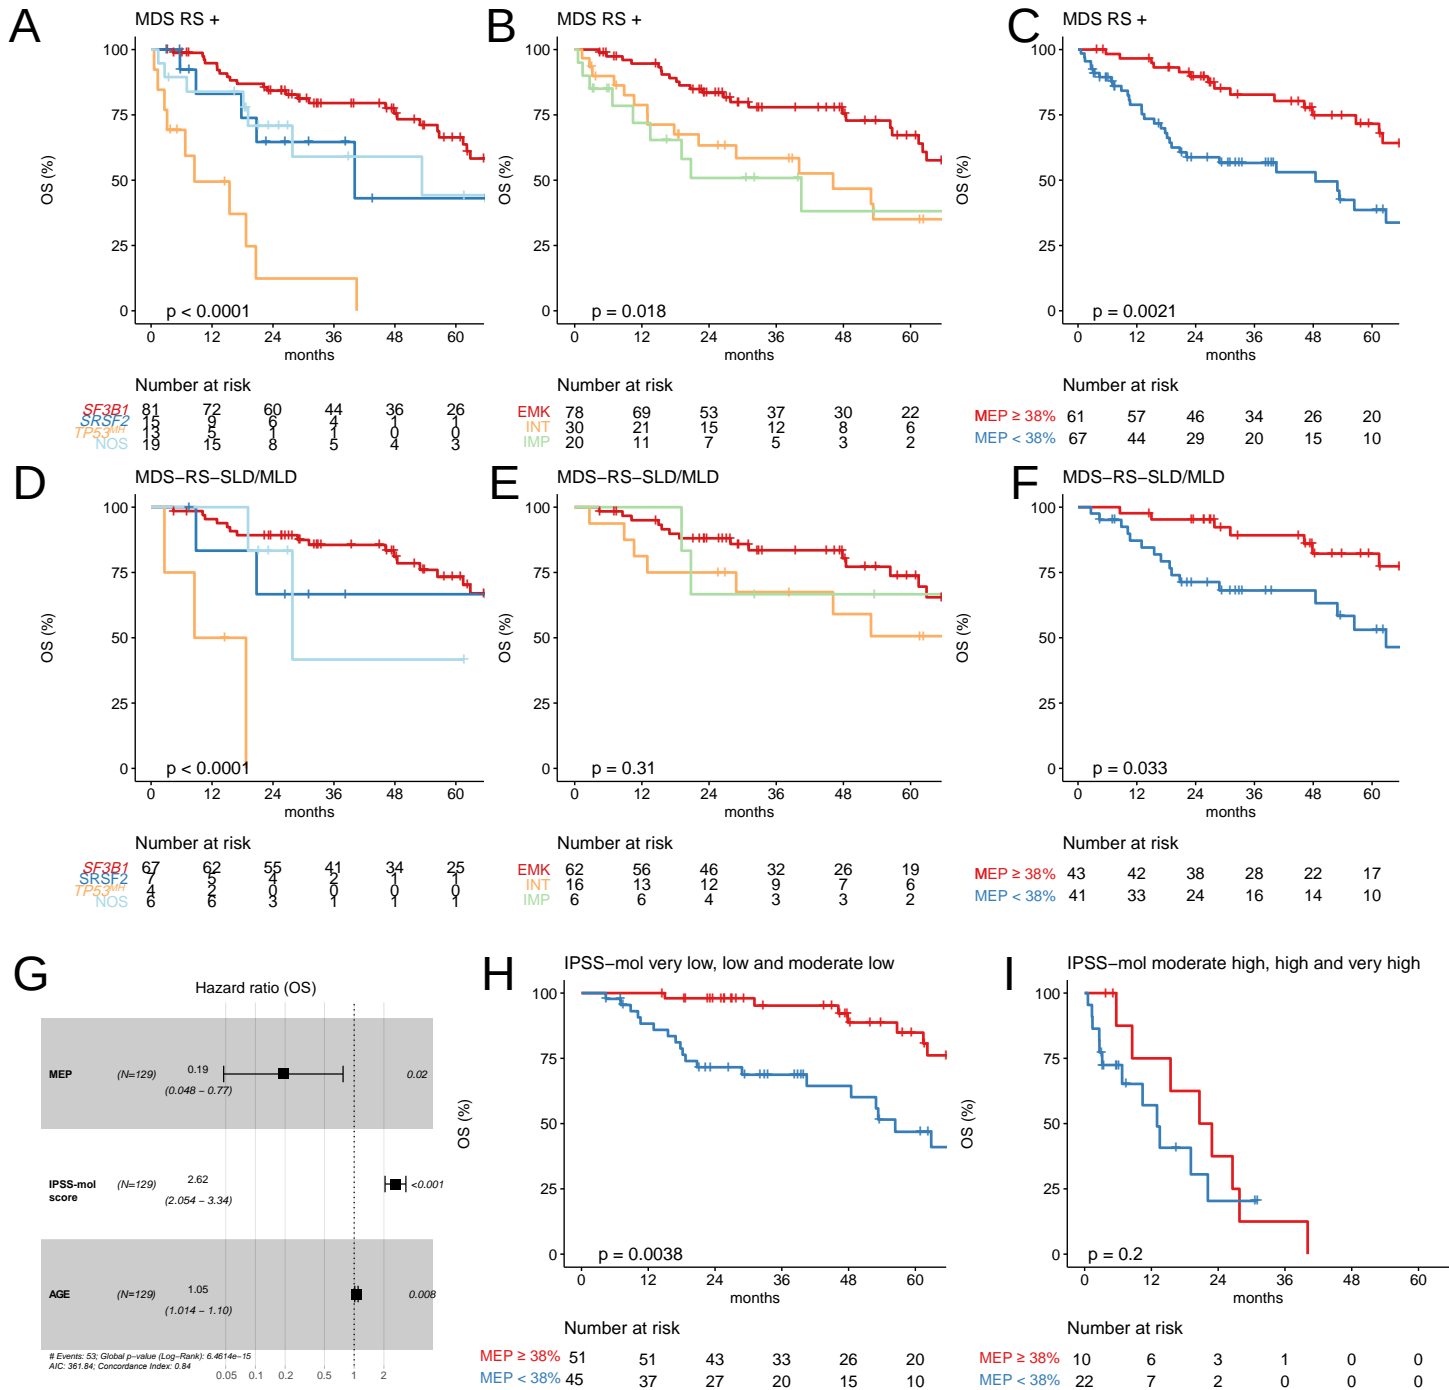

Supplement: ccr-23-0538_supplementary_figure_s19_suppfs19.pdf [file ccr-23-0538_supplementary_figure_s19_suppfs19.pdf]

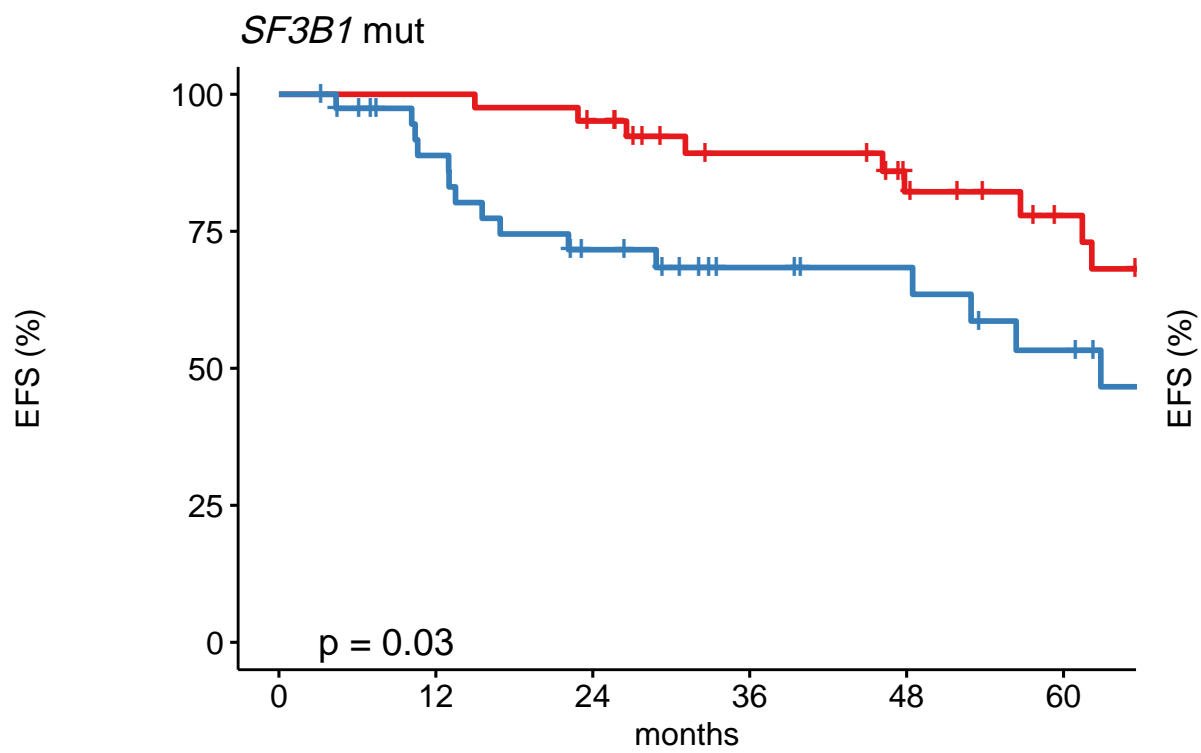

Number at risk

|           |    |    |    |    |    |    |
|-----------|----|----|----|----|----|----|
| MEP ≥ 38% | 41 | 41 | 37 | 28 | 22 | 16 |
| MEP < 38% | 40 | 31 | 23 | 16 | 14 | 10 |

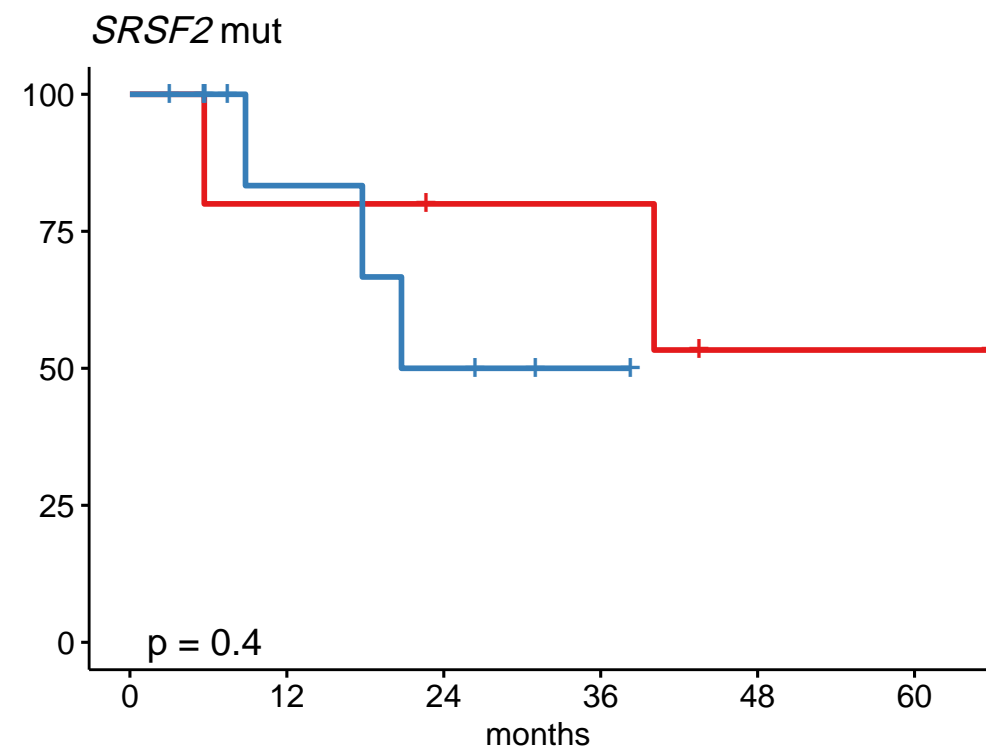

Number at risk

|           |    |   |   |   |   |   |
|-----------|----|---|---|---|---|---|
| MEP ≥ 38% | 5  | 4 | 3 | 3 | 1 | 1 |
| MEP < 38% | 10 | 5 | 3 | 1 | 0 | 0 |

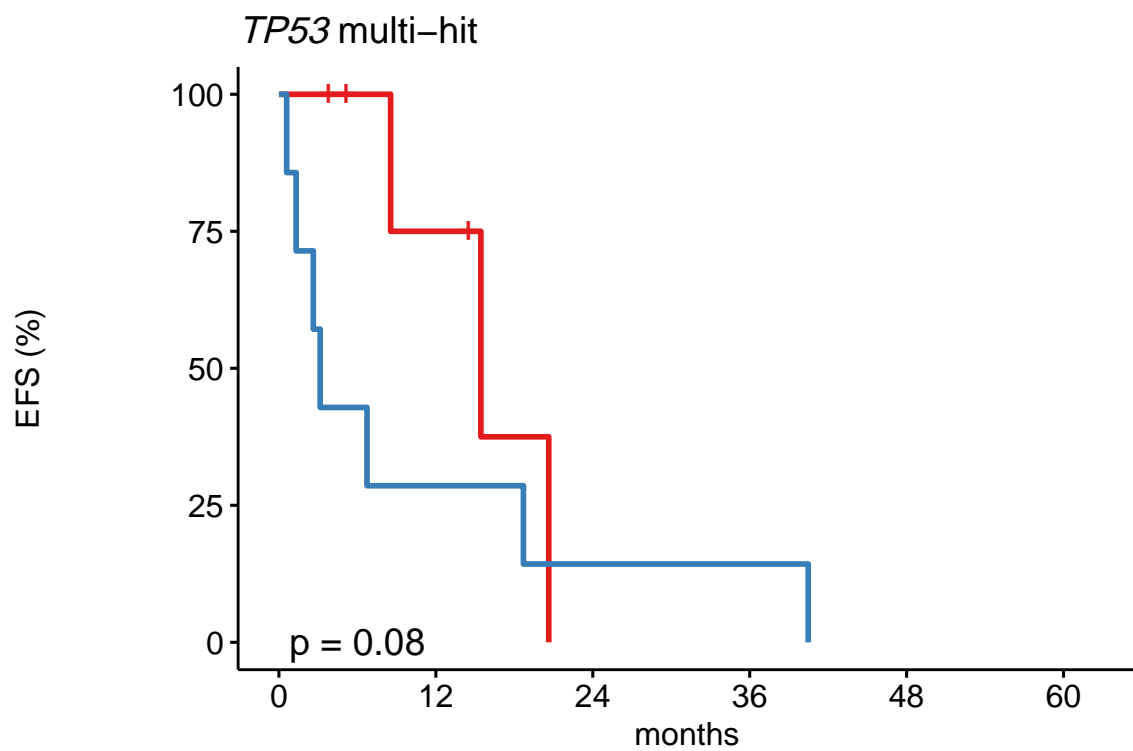

Number at risk

|           |   |   |   |   |   |   |
|-----------|---|---|---|---|---|---|
| MEP ≥ 38% | 6 | 3 | 0 | 0 | 0 | 0 |
| MEP < 38% | 7 | 2 | 1 | 1 | 0 | 0 |

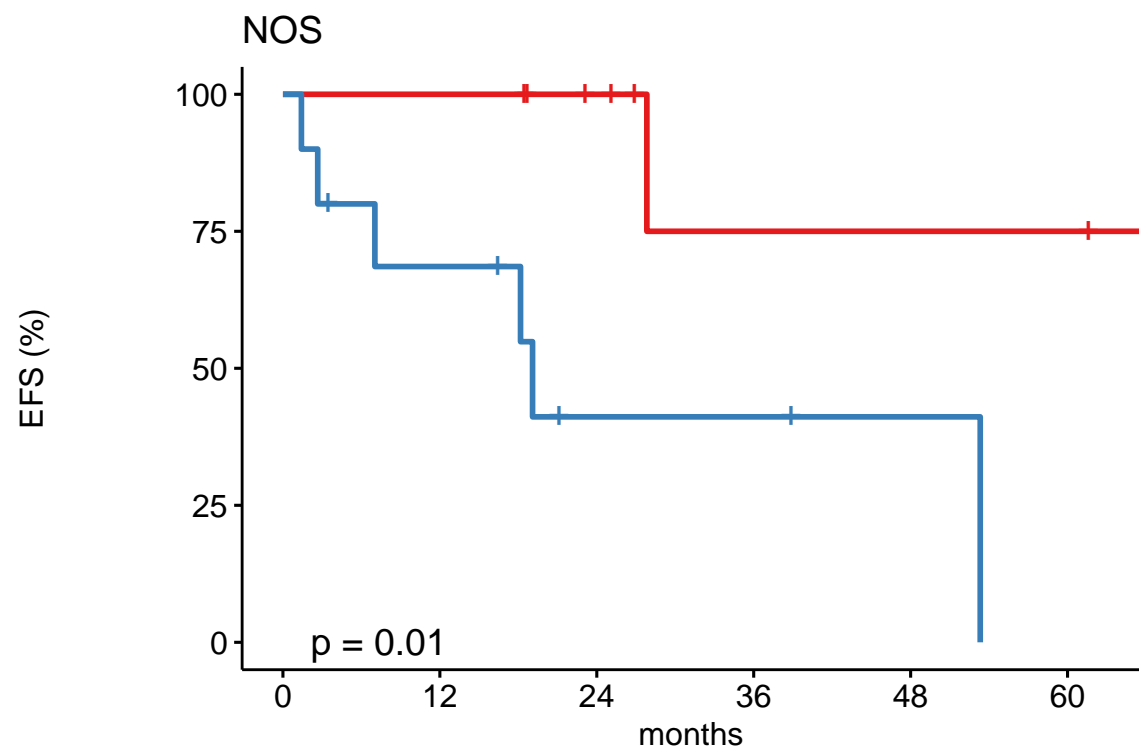

Number at risk

|           |    |   |   |   |   |   |
|-----------|----|---|---|---|---|---|
| MEP ≥ 38% | 9  | 9 | 6 | 3 | 3 | 3 |
| MEP < 38% | 10 | 6 | 2 | 2 | 1 | 0 |

Supplement: ccr-23-0538_supplementary_figure_s20_suppfs20.pdf [file ccr-23-0538_supplementary_figure_s20_suppfs20.pdf]

**A**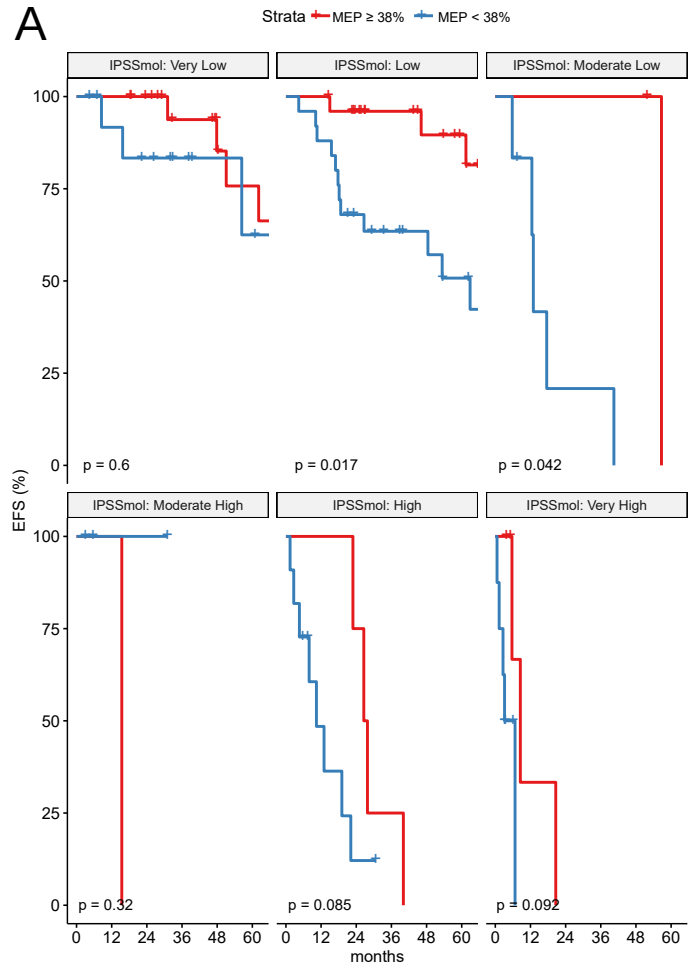**B**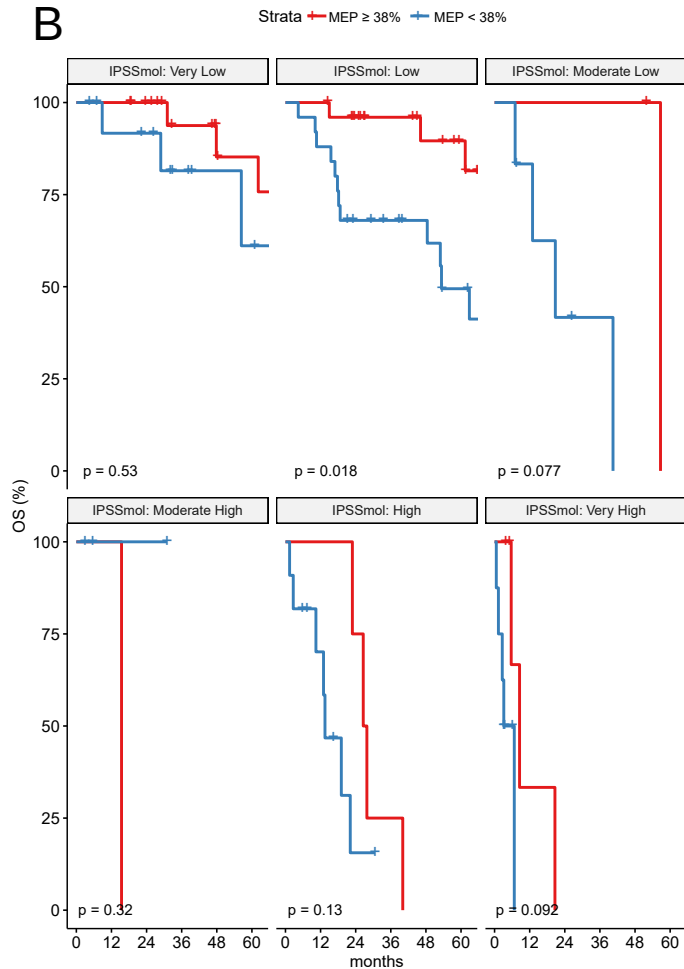

Supplement: ccr-23-0538_supplementary_figure_s21_suppfs21.pdf [file ccr-23-0538_supplementary_figure_s21_suppfs21.pdf]

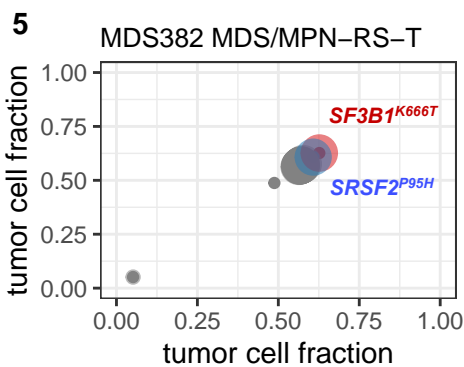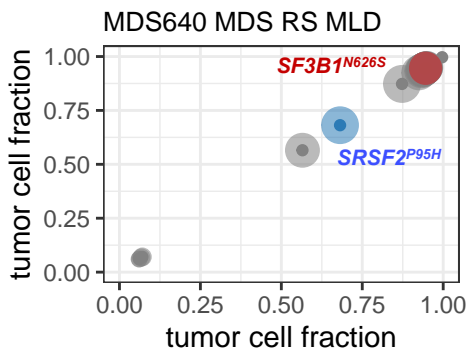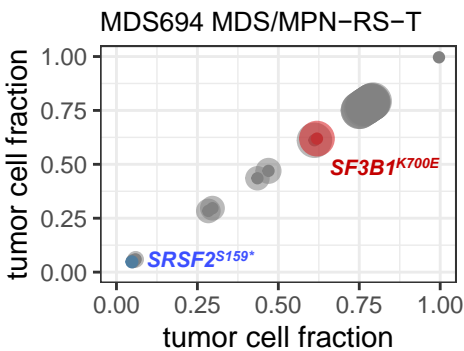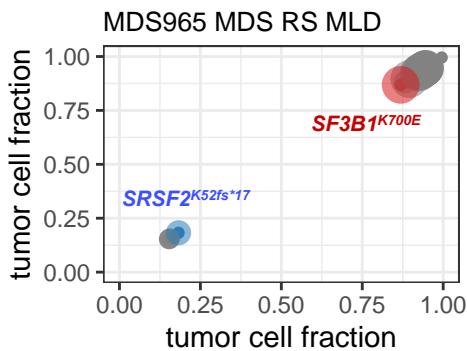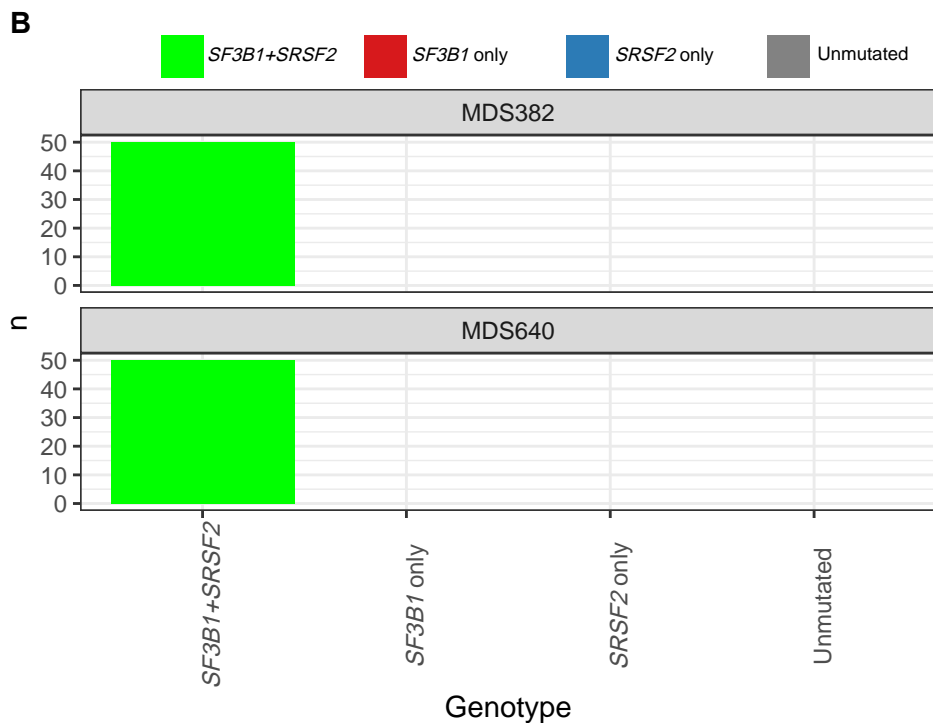

Supplement: ccr-23-0538_supplementary_figure_s2_suppfs2.pdf [file ccr-23-0538_supplementary_figure_s2_suppfs2.pdf]

### *SRSF2*

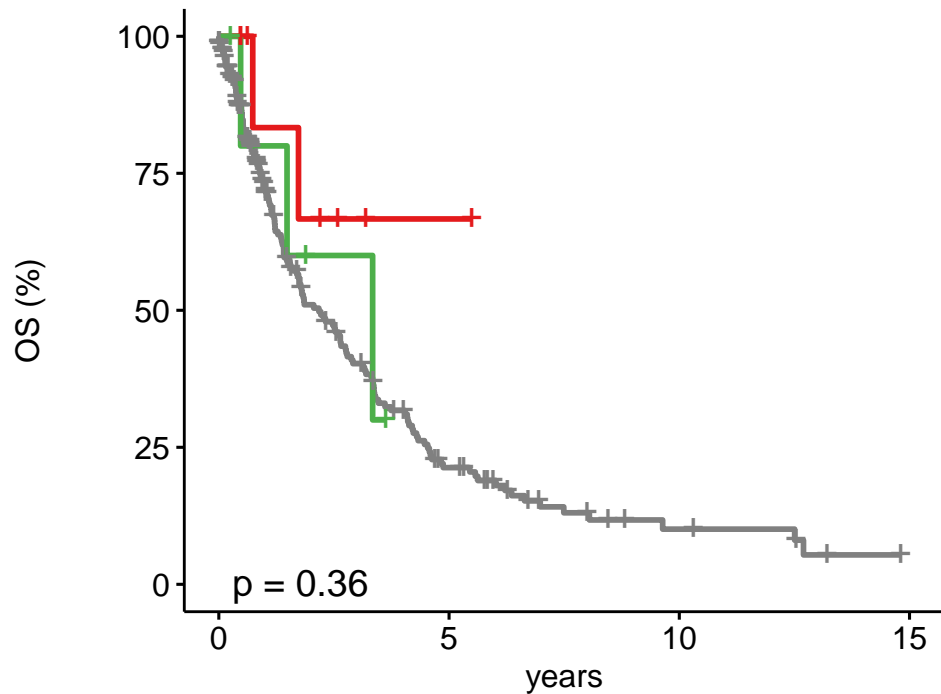

Number at risk

|                |     |    |   |   |
|----------------|-----|----|---|---|
| no RS          | 228 | 29 | 6 | 0 |
| RS $\geq 15\%$ | 9   | 1  | 0 | 0 |
| RS 5-15%       | 6   | 0  | 0 | 0 |

### *TP53<sup>MH</sup>*

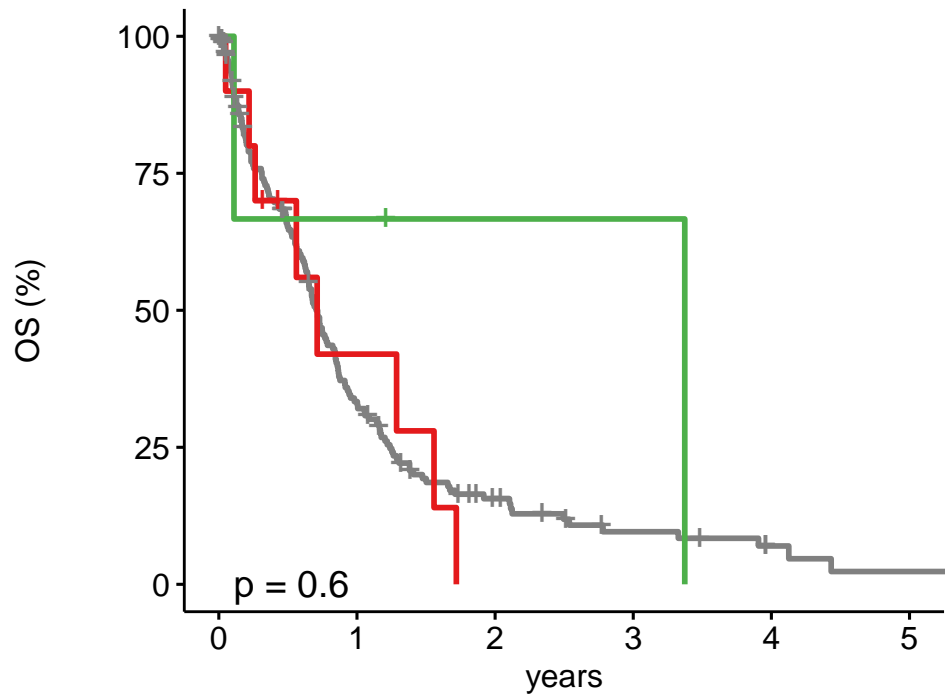

Number at risk

|                |     |    |    |   |   |   |
|----------------|-----|----|----|---|---|---|
| no RS          | 177 | 52 | 18 | 8 | 3 | 1 |
| RS $\geq 15\%$ | 10  | 3  | 0  | 0 | 0 | 0 |
| RS 5-15%       | 3   | 2  | 1  | 1 | 0 | 0 |

Supplement: ccr-23-0538_supplementary_figure_s3_suppfs3.pdf [file ccr-23-0538_supplementary_figure_s3_suppfs3.pdf]

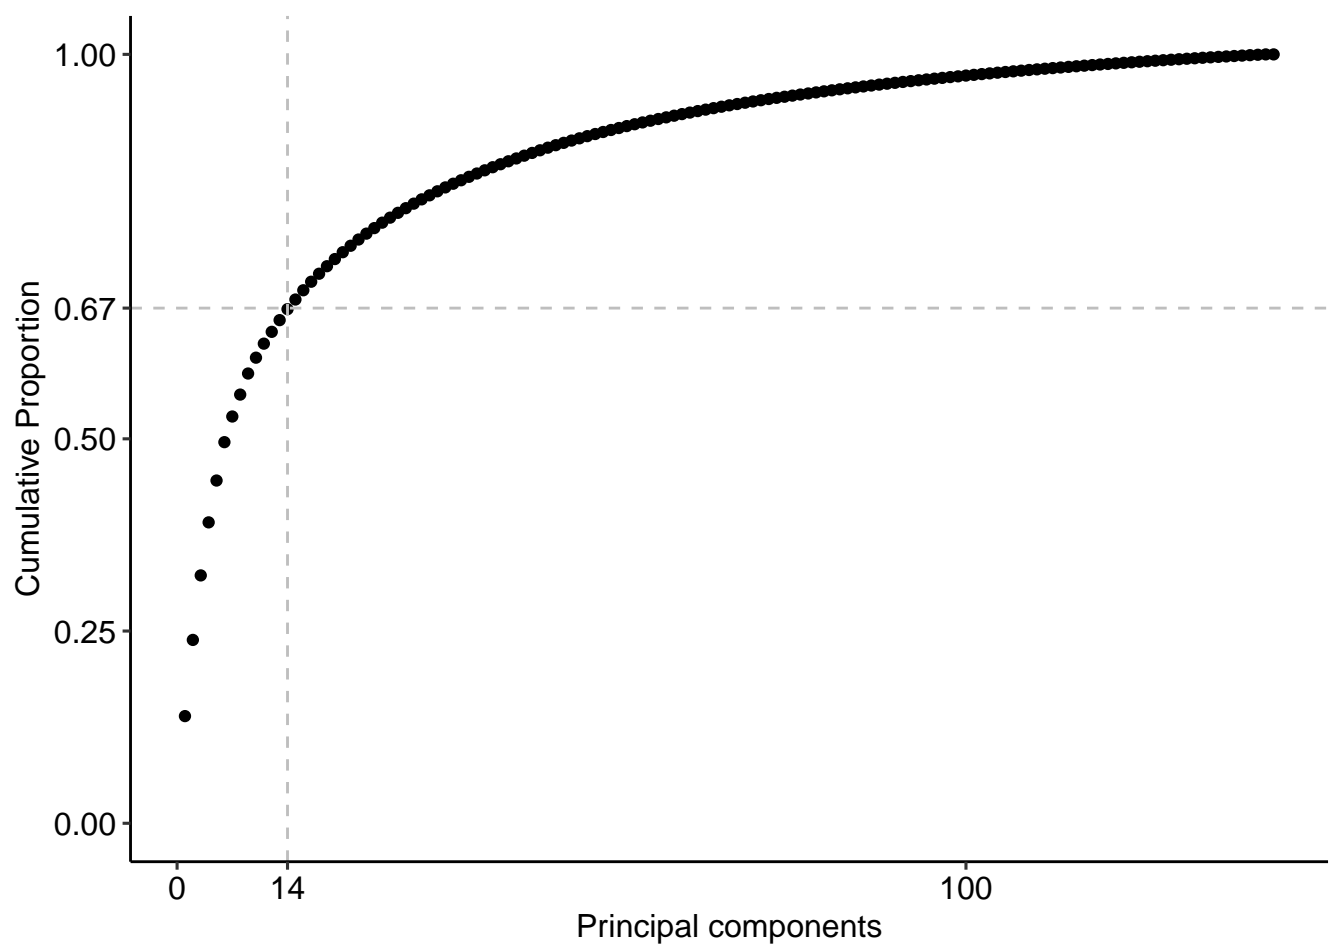

Supplement: ccr-23-0538_supplementary_figure_s5_suppfs5.pdf [file ccr-23-0538_supplementary_figure_s5_suppfs5.pdf]

PC1 top 250 contributors

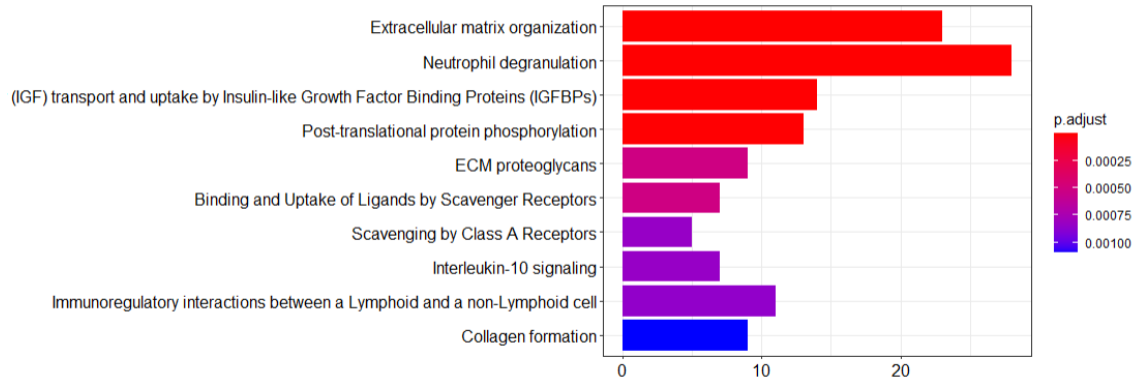

Supplement: ccr-23-0538_supplementary_figure_s6_suppfs6.pdf [file ccr-23-0538_supplementary_figure_s6_suppfs6.pdf]

PC2 top 250 contributors

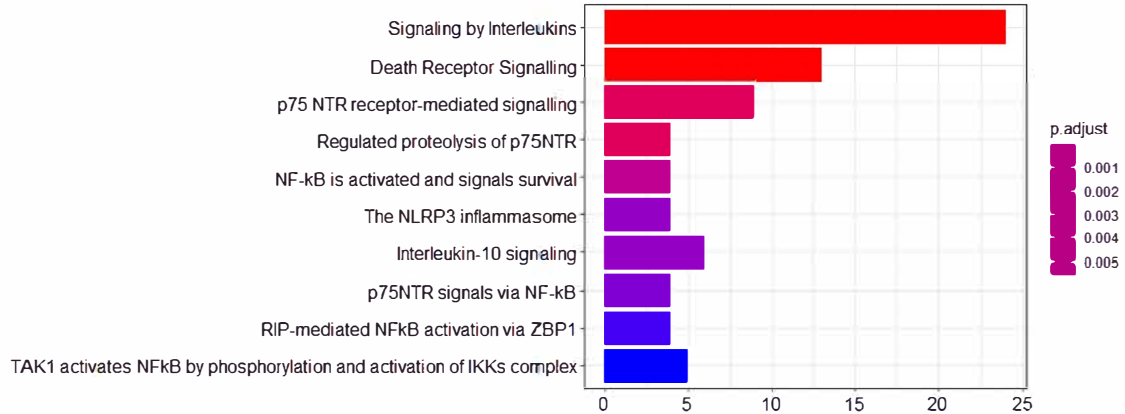

Supplement: ccr-23-0538_supplementary_figure_s7_suppfs7.pdf [file ccr-23-0538_supplementary_figure_s7_suppfs7.pdf]

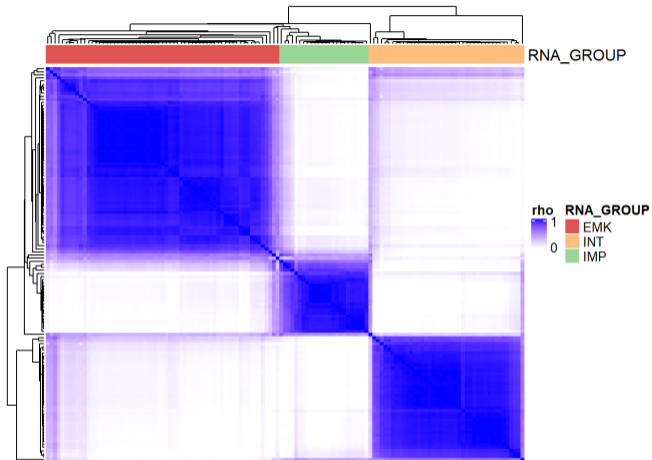

Supplement: ccr-23-0538_supplementary_figure_s8_suppfs8.pdf [file ccr-23-0538_supplementary_figure_s8_suppfs8.pdf]

RNA\_GROUP EMK INT IMP

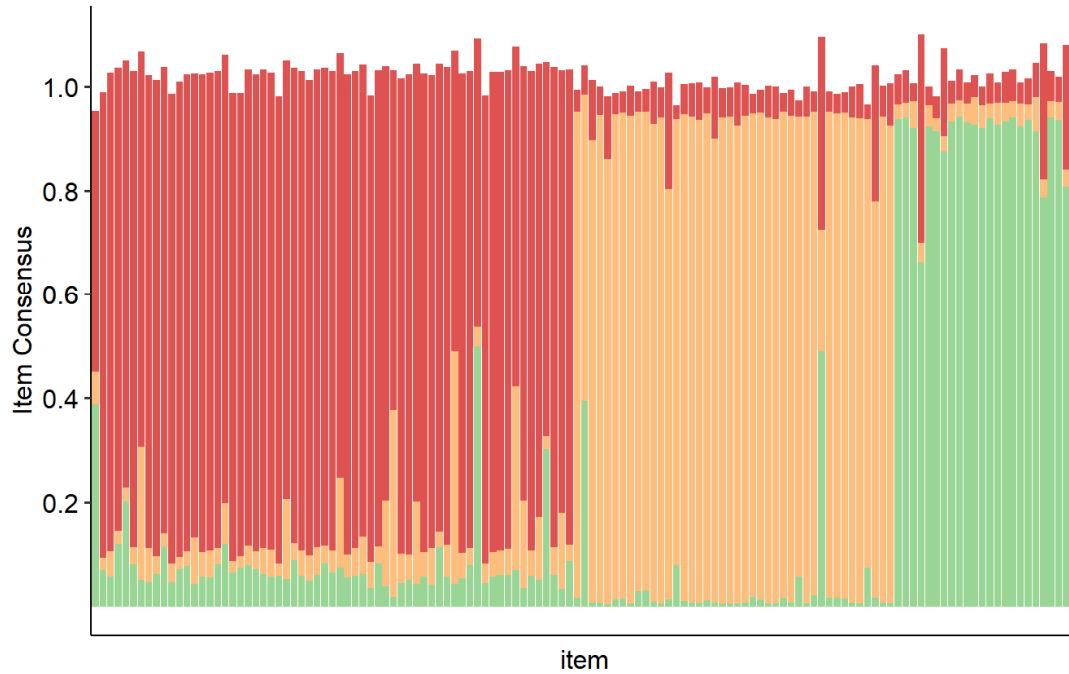

Supplement: ccr-23-0538_supplementary_figure_s9_suppfs9.pdf [file ccr-23-0538_supplementary_figure_s9_suppfs9.pdf]
